# Supplementary material
Source: publisher figshare collection journal article supplement (https://acs.figshare.com/ndownloader/files/12839579)
Supplement: Supplementary file 1 [file 12839579]

## SUPPORTING INFORMATION

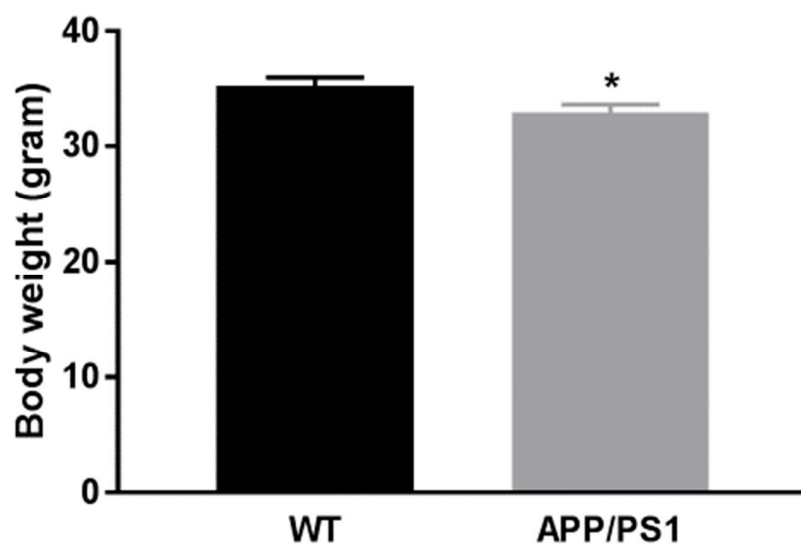

Figure S1. Body weight of WT and APP/PS1 mice at 8-9 months of age. A significant but mild reduction (7.8%) in weight was observed in APP/PS1 mice (n=70-72, Mann-Whitney test,  $p=0.017$ ).
